# Omnivory and feeding selectivity in five copepod species during spring in the Bellingshausen Sea, Antarctica

A. Atkinson

Atkinson, A. 1995. Omnivory and feeding selectivity in five copepod species during spring in the Bellingshausen Sea, Antarctica. – ICES J. mar. Sci., 52: 385–396.

Copepod grazing experiments were undertaken along a transect of five stations in the Bellingshausen Sea during austral spring. The stations spanned unproductive, nanoflagellate-dominated waters under pack ice to an open water bloom of large diatoms in the north. The feeding habits of five dominant species were compared by incubating them in natural sea water. Feeding rates on individual food taxa were calculated from optical cell counts. The larger species (*Rhincalanus gigas*, *Calanus propinquus*, and *Calanoides acutus*) tended to eat larger cells than did *Oithona* spp. and *Metridia gerlachei*, and cleared cells up to 100–200  $\mu\text{m}$  in length with increasing efficiency. Their clearance of longer cells remained high. *Oithona* spp. was the only species with high clearance rates on cells smaller than 10  $\mu\text{m}$ . Clearance rates on elongated cells were compared with those of shorter and fatter cells of similar volume. The longer cells were eaten at higher rates in 65% of comparisons, suggesting that cell elongation did not protect against ingestion by large copepods. Clearance rates of motile cells were compared with those of non-motile diatoms of similar size and shape. The copepods ranged widely, with *Oithona* spp. at one extreme, ingesting motile cells almost exclusively. *M. gerlachei* and *C. propinquus* showed a preference for motile taxa compared with similar sized diatoms. The fact that the motile fraction comprised an array of taxa (nanoflagellates, dinoflagellates, and ciliates), all with a tendency to be cleared more rapidly than diatoms by the above three species, suggests that they were using mechanoreception to detect prey. *Oithona* spp., *M. gerlachei*, and *C. propinquus* were actively feeding under the ice before the bloom, in low productivity waters characterized by a nanoflagellate community and a high inorganic detritus content. The selection for motile taxa persisted, by *M. gerlachei* at least, into the bloom, even though motile cells comprised only a small fraction of available carbon at that time. *C. acutus* and *R. gigas* by contrast, migrated to the surface layers to start feeding on the bloom. These two species appeared to have fed indiscriminately on both motile and non-motile taxa. The contribution of motile taxa to copepod diets depended on their contribution to the overall food source, the extent of motile/sessile selection, and also on their size and shape relative to the diatoms. Consequently the proportion of motile taxa in copepod diets ranged from 100% (*Oithona* spp. before the bloom) to 3% (*R. gigas* during the bloom).

© 1995 International Council for the Exploration of the Sea

Key words: Bellingshausen Sea, copepods, omnivory, selective feeding, Southern Ocean.

A. Atkinson: British Antarctic Survey, Natural Environment Research Council, High Cross, Madingley Road, Cambridge CB3 0ET, UK.

## Introduction

Evidence is increasing that oceanic copepods often graze only a small fraction of daily primary production (e.g. Morales *et al.*, 1991, 1993; Dagg *et al.*, 1993). In several habitats, protozoans have been either directly or indirectly identified as the major grazers (Turner and Granéli, 1992; Tsuda *et al.*, 1989; Frost, 1993). Nevertheless, copepods have a potential role, through selective grazing, in shaping the species composition of microplankton (Granéli *et al.*, 1993; see Banse, 1992). For example, they may eat protozoan grazers as well as

primary producers (e.g. Kleppel *et al.*, 1988; Turner and Granéli, 1989; Gifford, 1993a; Stoecker and Egloff, 1987; Fessenden and Cowles, 1994). Copepods may thus act on microplankton as “herbivorous grazers” and as “top predators”, the relative balance depending on whether copepods are indiscriminate feeders (e.g. Huntley, 1981; Turner and Tester, 1989; Tiselius, 1989) or tend towards carnivory (Landry and Fagerness, 1988; Turner and Granéli, 1992). Carnivorous feeding provides a source of nutrition for the copepod that is not detected by the most commonly used study approaches based on chlorophyll assays. Studying

Table 1. Station positions and environment along transect in Bellingshausen Sea.

| Station, latitude | Date                 | Extent of ice cover | Temperature of mixed layer | Depth of mixed layer | Chlorophyll <i>a</i> in incubation water ng l <sup>-1</sup> |
|-------------------|----------------------|---------------------|----------------------------|----------------------|-------------------------------------------------------------|
| G (70°17'S)       | 15/11/92 to 18/11/92 | Solid pack          | -1.8°C                     | (> 100 m)            | 52                                                          |
| H (70°15'S)       | 29/11/92             | Solid pack          | -1.8°C                     | (> 100 m)            | 107                                                         |
| I (69°39'S)       | 1/12/92 to 2/12/92   | Ice edge            | -1.8°C                     | 70 m                 | 174                                                         |
| J (68°18'S)       | 4/12/92 to 5/12/92   | Ice-free            | -1.3°C                     | 50-70 m              | 894                                                         |
| K (67°41'S)       | 7/12/92 to 9/12/92   | Ice-free            | -1.0°C                     | 50-70 m              | 3244                                                        |

selective feeding in copepods is therefore a prerequisite to quantifying their food intake and to understanding population dynamics and species composition of the microplankton.

That copepods eat protozoans and micrometazoans as well as autotrophs is now well known, from gut contents analysis (e.g. Turner, 1991; Øresland and Ward, 1993; Hopkins *et al.*, 1993a, b) and from feeding experiments (e.g. Landry, 1981; Stoecker and Egloff, 1987; Gifford, 1993a). Indeed, protozoans are often numerous (Garrison, 1991), highly nutritious (Stoecker and Capuzzo, 1990), and within the size range on which copepods can graze (Berggreen *et al.*, 1988). However, whether copepods ingest protozoans selectively or indiscriminately is a more open question. Gut content analysis suffers from being only semi-quantitative and from not representing athecate taxa, which often dominate the protozoan community but are unrecognizable in copepod guts. Alternatively, both incubation methods and film observation can be criticized for not mimicking the natural environment.

The question of selective grazing was considered on a cruise of RRS "James Clark Ross" in the marginal ice zone in the Bellingshausen Sea, Antarctica. Feeding experiments were completed along a five-station transect out of the ice during early spring (November/December 1992). The copepods were incubated in natural sea water and uneaten food items were counted under a microscope before and after the experiments. This enabled feeding rates on individual taxa to be determined. The distinction between protozoans and autotrophs is not clear-cut, so the approach in this study was to classify cells as motile (i.e. free-swimming) or non-motile, rather than as animal or plant. This is a more natural distinction, easier to make, and addresses the question of whether copepods might have been using mechanoreception to detect prey movement remotely. Because food selectivity is also dependent on cell size, shape, and taste (see Price, 1988) a range of motile and non-motile taxa (nanoflagellates, dinoflagellates, ciliates, and diatoms) were enumerated and each classified

broadly according to size and shape. This approach aimed to differentiate some of the attributes of a cell that might influence the rate at which it is grazed. Five copepod species were incubated, ranging in size from *Oithona* spp. (mainly *O. similis*) up to *Rhinocalanus gigas* (approximately  $\approx 2 \mu\text{g}$  to  $\approx 1750 \mu\text{g}$  range in adult female dry mass). With several copepod species simultaneously exposed to natural assemblages of diverse food types, some comparative questions could be addressed on their feeding behaviour: (1) Were the species capable of feeding on particles across the full size range of food (6  $\mu\text{m}$  to 600  $\mu\text{m}$ ) which was measured? (2) Did the species differ appreciably in the sizes of food which they ate? (3) Were elongated cells eaten at different rates to more spherical cells of a similar volume? (i.e. does cell elongation provide a refuge from predation?) (4) In comparisons of cells of similar size and shape, did any of the copepods select motile taxa, rather than non-motile diatoms?

## Materials and methods

Copepod feeding experiments were conducted at five stations on a transect along 85°W out of the ice in the Bellingshausen Sea in austral spring 1992 (Table 1). The copepod community and their overall feeding activity at these stations is described by Atkinson and Shreeve (1995). The environment, zooplankton/phytoplankton relationships, and microzooplankton composition and grazing are covered respectively by Turner and Owens (1995), Robins *et al.* (1995) and Burkill *et al.* (1995).

Copepods for feeding experiments were obtained from slow, vertical hauls with a 70 cm ring net (mesh size 200  $\mu\text{m}$ ) from either 50 m or 100 m to the surface. Undamaged and actively swimming individuals were sorted from the diluted contents of the 5 l solid codend and placed in 1.2 l bottles of unscreened surface sea water. The predominant species in the catches were selected for incubation (Table 2). The seasonal migrants, *R. gigas*, *Calanoides acutus* and *Metridia gerlachei* were rare in the surface layer prior to the bloom, which

Table 2. Species and stages used in grazing experiments, listed in descending order of mean body mass. Numbers of jars incubated per experiment are listed under each station.

| Species                   | Stage       | Mean drymass<br>( $\mu\text{g individ.}^{-1}$ ) | Mean no. $l^{-1}$ | Station |    |   |   |   |
|---------------------------|-------------|-------------------------------------------------|-------------------|---------|----|---|---|---|
|                           |             |                                                 |                   | G       | H  | I | J | K |
| <i>Rhincalanus gigas</i>  | CVI♀        | 1507                                            | 5                 | —       | —  | — | 2 | 2 |
| <i>Calanus propinquus</i> | CVI♀        | 902                                             | 3                 | 1       | 2  | 1 | 2 | 2 |
| <i>Calanoides acutus</i>  | CVI♀        | 532                                             | 7                 | —       | 1* | — | 2 | 1 |
| <i>Metridia gerlachei</i> | CVI♀        | 183                                             | 8                 | —       | —  | 2 | 3 | 1 |
| <i>Oithona similis</i>    | >70%<br>CVI | 2.15                                            | 81                | 2       | 2  | 1 | — | — |

\*CV and adults incubated together, but they did not feed.

tended to preclude their use in grazing experiments at stations G, H, and I. Difficulties in shipboard identification precluded separation of living *Oithona* spp. into species and stages. These were confirmed by subsequent analysis to comprise over 70% of adult females of *O. similis*, the remainder being their late stage copepodites and those of its larger congener *O. frigida*. Unfortunately, *Oithona* spp. could not be incubated at the two bloom stations because it was nearly impossible to separate them from numerous large diatoms and small metazoans in the catches.

Natural sea water was used as the food medium. This was collected from the surface with a clean plastic bucket, 1–3 h before the start of each experiment. Its chlorophyll content was obtained by filtering 1 l under gentle vacuum onto a GF/C filter. Filters were then frozen ( $-60^{\circ}\text{C}$ ) and chlorophyll *a* content measured by the fluorometric method (Parsons *et al.*, 1984) using a Shimadzu RF 540 Scanning Spectrofluorometer. These surface values (Table 1) are broadly in line with surface values from HPLC profiles (R. Barlow, unpublished cruise report). Barlow's chlorophyll profiles show that subsurface maxima were either slight or non-existent, so the incubation water was a reasonable representation of food available in the mixed layer.

All experiments were set up at midnight, after the copepods had acclimated in the 1.2 l bottles of ambient sea water for  $\approx 18$  h. The incubation water was mixed with a plastic plunger in an acid washed 50 l carboy and transferred to 2.4 l glass grazing jars. It was not pre-screened, to reduce mortality of delicate aloricate ciliates (Gifford, 1993b) and to retain long filamentous and spiny diatoms, which were being tested as a food source.

After adding the copepods, one initial 100 ml subsample of water from each jar was preserved in acid Lugol's solution. The jars were then topped up with incubation water and placed on a grazing wheel (0.5 rpm) in a modified chest freezer. All incubations were for 24 h in dim light and at  $-1^{\circ}\text{C}$  to  $0^{\circ}\text{C}$ . Rotation of the jars was end-over-end. Two or three control jars,

containing no copepods, were treated identically.

On termination of the experiments two 200 ml subsamples of water from each jar were preserved in Lugol's solution. Experimental copepods were then checked for mortality. For *Oithona* spp. this was difficult because of their small size, their large numbers (Table 2) and because they move very irregularly. Mortality was checked by touching 30 individuals in each jar several times with a thermometer, to check for an escape response. Estimated mortality in *Oithona* spp. was less than 10%; that of the other species was negligible. The experimental copepods were concentrated onto a GF/C filter and frozen ( $-60^{\circ}\text{C}$ ) for subsequent counting and species/stage verification and dry mass measurement (see Atkinson and Shreeve, 1995).

#### Cell counts and calculation of feeding rates

A 50 ml aliquot of each subsample (i.e. two replicates for each grazing jar) was settled for  $>24$  h and enumerated under an inverted microscope. The aliquots were selected randomly and "blind" in order to reduce potential bias due to subjective identifications, for example of small nanoflagellates or partially empty diatom frustules. The whole of the receptacle of the settling chamber was analysed for large taxa at  $\times 100$  magnification. Small and numerous cells (nanoflagellates and small pennate and centric diatoms) were counted on either two or three scans across the full diameter of the slide at  $\times 200$ . Table 3 gives the food taxa sufficiently abundant ( $>30$ , on average, in initial and control aliquots) for inclusion in calculations of feeding rate. The emphasis in identification was not towards an exhaustive taxonomic breakdown but rather to group diatoms, nanoflagellates, dinoflagellates, and ciliates according to their size and shape. The majority of both dinoflagellates and ciliates were athecate forms (Burkill *et al.*, 1995). Counts of both thecate and athecate forms of each were pooled in order to increase sample sizes. Likewise, the group "large pennate diatoms" comprises several uncommon taxa of similar

Table 3. Food taxa sufficiently abundant for use in calculations of filtration and ingestion rates. Taxa are listed in ascending order of length.

| Station                          | Food taxon                                 | Mean length (µm) | Mean width (µm) | Mean volume (µm <sup>3</sup> ) |
|----------------------------------|--------------------------------------------|------------------|-----------------|--------------------------------|
| G                                | Nanoflagellates                            | 7.3              | 4.5             | 103                            |
|                                  | Small dinoflagellates                      | 20               | 10              | 1709                           |
|                                  | <i>Nitzschia kerguelensis</i> <sup>1</sup> | 22               | 8.5             | 2554                           |
|                                  | Medium dinoflagellates                     | 35               | 19              | 10351                          |
|                                  | Large pennate diatoms                      | 80               | 35              | 24122                          |
|                                  | <i>Nitzschia</i> spp.                      | 60               | 4.9             | 408                            |
| H                                | Nanoflagellates                            | 6.2              | 4.1             | 95                             |
|                                  | <i>Thalassionema</i> spp.                  | 17               | 2.9             | 141                            |
|                                  | Small dinoflagellates                      | 19               | 11              | 1753                           |
|                                  | Ciliates                                   | 20               | 15              | 2018                           |
|                                  | <i>Nitzschia kerguelensis</i> <sup>1</sup> | 35               | 13              | 3461                           |
|                                  | <i>Nitzschia closterium</i>                | 43               | 2.5             | 50                             |
|                                  | Medium dinoflagellates                     | 43               | 24              | 18895                          |
|                                  | Large pennate diatoms                      | 87               | 22              | 18984                          |
| I                                | Nanoflagellates                            | 6.4              | 4.9             | 108                            |
|                                  | Small dinoflagellates                      | 20               | 12              | 1994                           |
|                                  | <i>Nitzschia kerguelensis</i> <sup>1</sup> | 22               | 9.6             | 1190                           |
|                                  | Ciliates                                   | 27               | 19              | 8932                           |
|                                  | Medium dinoflagellates                     | 36               | 24              | 14618                          |
|                                  | Large pennate diatoms                      | 72               | 19              | 12385                          |
|                                  | <i>Nitzschia closterium</i>                | 114              | 7.1             | 700                            |
| J                                | Nanoflagellates                            | 8.1              | 5.4             | 168                            |
|                                  | Small dinoflagellates                      | 22               | 13              | 2187                           |
|                                  | <i>Nitzschia kerguelensis</i> <sup>1</sup> | 38               | 15              | 2118                           |
|                                  | Medium dinoflagellates                     | 44               | 26              | 18239                          |
|                                  | <i>Distephanus</i> spp.                    | 48               | 15              | 2714                           |
|                                  | Medium centric diatoms                     | 62               | 25              | 33418                          |
|                                  | Large centric diatom                       | 83               | 43              | 122532                         |
|                                  | Large pennate diatoms                      | 98               | 19              | 31539                          |
|                                  | Large dinoflagellates                      | 102              | 39              | 73109                          |
|                                  | <i>Nitzschia kerguelensis</i> <sup>2</sup> | 137              | 33              | 3442                           |
|                                  | <i>Nitzschia</i> spp.                      | 144              | 7.6             | 2250                           |
|                                  | <i>Thalassia tumida</i> ?                  | 242              | 50              | 171947                         |
|                                  | <i>Corethron</i> sp.                       | 356              | 47              | 277443                         |
|                                  | <i>Rhizosolenia</i> spp.                   | 465              | 19              | 135977                         |
| <i>Thalassiothrix antarctica</i> | 586                                        | 8.0              | 30321           |                                |
| K                                | Nanoflagellates                            | 8.1              | 5.2             | 152                            |
|                                  | Small centric diatom sp.                   | 10               | 3.8             | 116                            |
|                                  | Small dinoflagellates                      | 20               | 13              | 1853                           |
|                                  | Small centric diatoms                      | 23               | 18              | 5895                           |
|                                  | Medium dinoflagellates                     | 40               | 26              | 12930                          |
|                                  | Small/medium ciliates                      | 43               | 19              | 12534                          |
|                                  | <i>Distephanus</i> sp.                     | 43               | 14              | 2350                           |
|                                  | Large dinoflagellates                      | 73               | 44              | 95765                          |
|                                  | <i>Nitzschia kerguelensis</i> <sup>2</sup> | 85               | 34              | 70026                          |
|                                  | Large centric diatoms                      | 90               | 36              | 207543                         |
|                                  | Large ciliates                             | 90               | 57              | 244333                         |
|                                  | <i>Eucampia antarctica</i>                 | 95               | 20              | 106477                         |
|                                  | Large pennate diatoms                      | 100              | 23              | 66790                          |
|                                  | <i>Nitzschia</i> spp.                      | 120              | 6.3             | 2010                           |
|                                  | <i>Chaetoceros</i> spp.                    | 132              | 9.4             | ≈5000                          |
|                                  | <i>Rhizosolenia</i> spp.                   | 250              | 10              | 62496                          |
| <i>Thalassiothrix antarctica</i> | 327                                        | 8.1              | 15761           |                                |

<sup>1</sup>Colonies of up to four individuals.

<sup>2</sup>Colonies of more than four individuals.

dimensions which have been pooled to provide statistically meaningful feeding rate estimates. In these incubations the mean number of cells remaining at the end of the experiment was 71% of the final control values.

For each experiment the dimensions of each food category were obtained by measuring between 10 and 50 individuals, depending on variability in size. Cell volumes were then calculated from approximations to simple geometric shapes. Carbon content per cell was then estimated using the equations of Eppley *et al.* (1970). Ingestion rates and clearance rates of each food taxon were calculated using the equations of Frost (1972). Each strand of the long diatom *Thalassiothrix antarctica* encountered was measured, with feeding rates then being based on differences in the total measured length of strands, rather than simply on differences in the number of strands. The dimensions and volumes of cell categories listed for each experiment in Table 3 refer to the mean values that a grazer would encounter. Variable mean dimensions of colonial species between experiments therefore reflect different colony sizes. Likewise, effective volumes do not correspond to plasma volumes for colonial cells such as *Eucampia antarctica*, where there is a gap between adjacent cells.

A potentially serious error in such experiments is that preservation and handling procedures may cause some food items to change in length between the start of the experiment and the final Lugol's sample. Colonial diatoms could fragment, from either grazer activity (Deason, 1980) or sample handling procedure (see Turner and Tester, 1989). Ciliates can shrink on preservation in Lugol's (e.g. Leakey *et al.*, 1994). Feeding rates of colonial diatoms were based on numbers of cells rather than numbers of colonies, to make an allowance for colony break-up. Colony size data were compiled from both initial and control samples to gauge the effective sizes that the copepods would encounter. No allowance has been made for shrinkage of aloricate cells because this seems rather variable for ciliates (see Leakey *et al.*, 1994). Decreases in their linear dimensions will not be so severe as volume shrinkage; a 30% loss in volume corresponds to a 12% decrease in length or width. The emphasis in these experiments was on comparing between species presented with identical food sources. This aimed to allow for any systematic errors in methodology.

## Results

Comparisons of feeding rates are based on clearance rather than ingestion, because the latter depends on both the feeding effort of the copepod (i.e. clearance rate) and the numbers and/or biomass of the food taxon. Clearance-rate measurements do not need to take account of the sizes of the food items, being based only

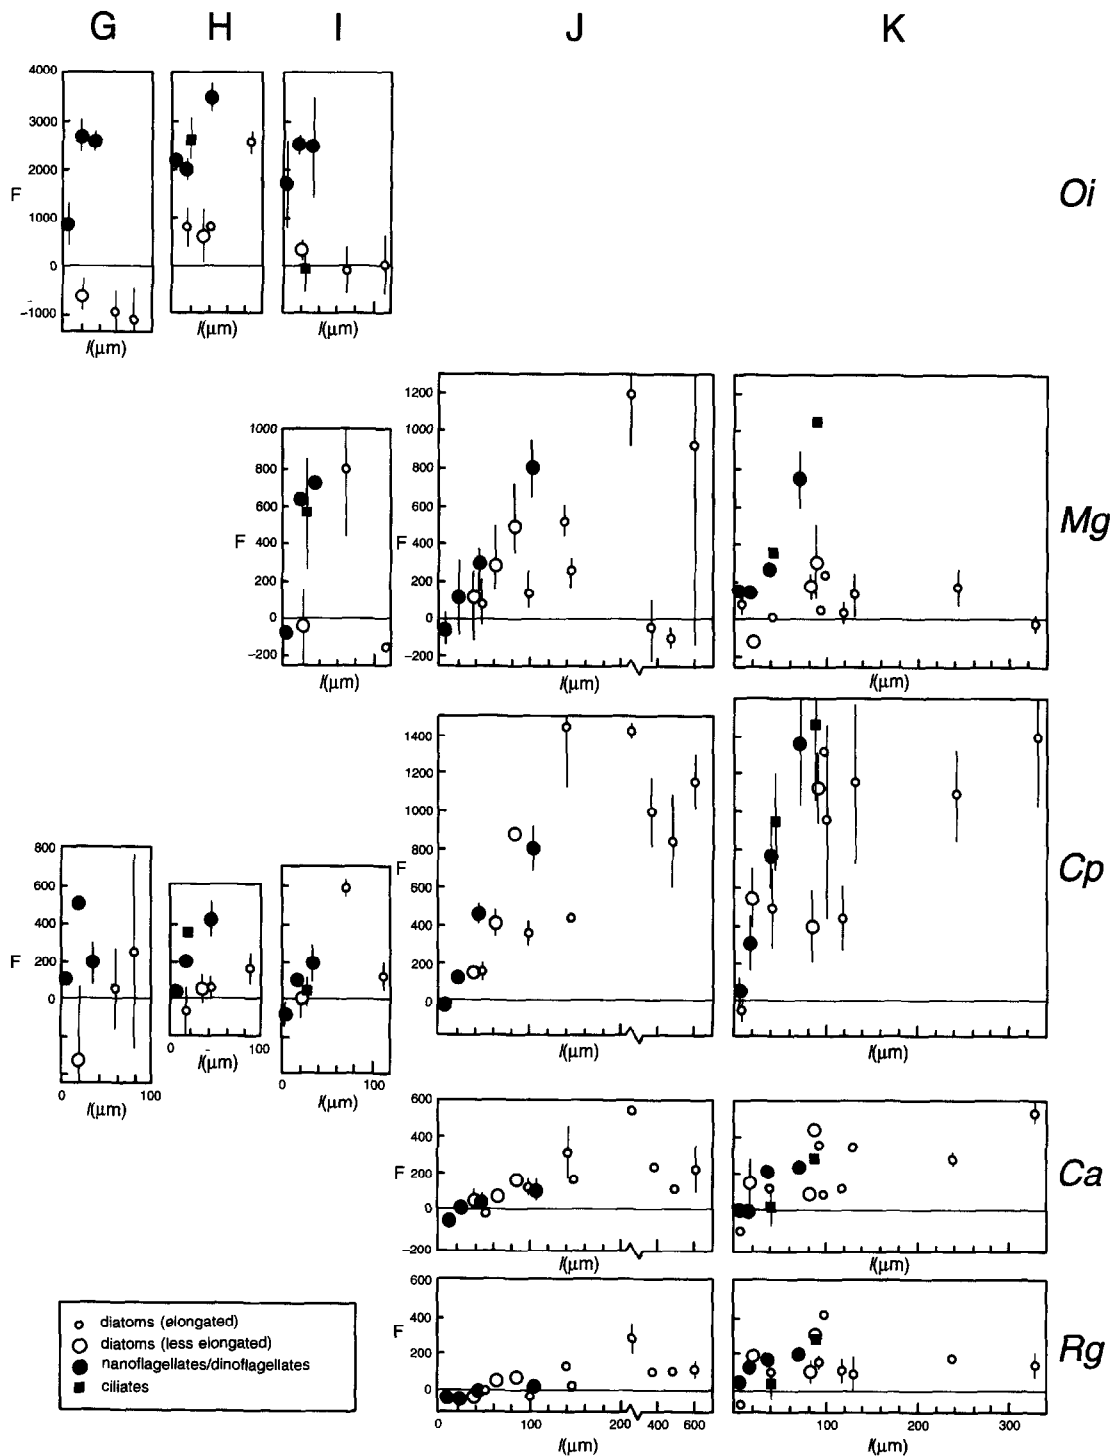

Figure 1. Oi = *Oithona* spp.; Mg = *Metridia gerlachei*; Cp = *Calanus propinquus*; Ca = *Calanoides acutus*; Rg = *Rhincalanus gigas*. Clearance rate (F) versus mean length of food taxa (l) for the five species at pre-bloom stations G, H, I and bloom stations J and K. Ratios of mean length to mean width for motile food taxa ranged up to 2.6 in these experiments, so diatoms with comparable ratios up to 2.6 are portrayed by large open circles. More elongated diatoms are given smaller open circles. Filled symbols represent motile taxa (see Table 3). Each bar on clearance scale represents 200 ml mg drymass<sup>-1</sup> d<sup>-1</sup> for all species except *Oithona* spp., where it represents 5 times this value. Error bars represent either the range of clearance rates obtained from two counted samples from a single grazing jar, or, where two or three jars were available (Table 2), the range in mean rates between jars.

Table 4. Mean food index (k) for the grazers incubated at each station. Ranges between replicate jars are in parentheses.

| Species                   | Station |                  |                 |               |   |               |
|---------------------------|---------|------------------|-----------------|---------------|---|---------------|
|                           | G       | H                | I               | J             | H | K             |
| <i>Rhincalanus gigas</i>  |         |                  |                 | 22.6 (10–34)  |   | 2.0 (1.9–2.0) |
| <i>Calanus propinquus</i> | 0.85    | 0.96 (0.42–1.5)  | 5.8             | 7.1 (4.8–9.4) |   | 2.5 (2.3–2.7) |
| <i>Calanoides acutus</i>  |         | (not feeding)    |                 | 5.1 (4.9–5.2) |   | 3.9           |
| <i>Metridia gerlachei</i> |         |                  | 0.93 (0.61–1.3) | 4.0 (2.1–5.4) |   | 2.0           |
| <i>Oithona</i> spp.       | 0 (0.0) | 0.86 (0.85–0.87) | 0.011           |               |   |               |

on the proportion of them remaining. This makes it easier to use as a measure of selective grazing. Figure 1 shows clearance rates for the five species, at the stations where they were measured, plotted against mean lengths of the food taxa. *Oithona* spp. had the highest mass specific clearance rates, followed by *M. gerlachei* and *C. propinquus*. The large species, *C. acutus* and *R. gigas* had the lowest mass specific feeding rates. Overall feeding rates are compared between species and stations, and related to their life cycles and the changing environment in Atkinson and Shreeve (1995).

#### Clearance rate and food size

The counted food items ranged in size from nanoflagellates 6–8 µm long up to pennate diatoms 600 µm long. For the four larger copepod species, clearance rates on nanoplankton were low and increased up to food sizes of 100–200 µm. Clearance of cells larger than this remained high. Interpretations of cell size selection are hindered by the fact that copepods may also select food on the basis of shape, motility, taste, particle volume distribution, and previous feeding history. Some of these characteristics are denoted by the symbols in Figure 1 and are described in the following two sections. For each station, the preferred food sizes of the copepods can be compared using a simple size index, k:

$$k = \frac{\text{mean clearance rate on taxa longer than } 50 \mu\text{m}}{\text{mean clearance rate on taxa shorter than } 50 \mu\text{m}}$$

The 50 µm cut-off, although arbitrary, was chosen because in each experiment there were sufficient cells both larger and smaller than this to enable k to be calculated. These indices (see Table 4) tend to be greater than unity for the large species, *R. gigas*, *C. propinquus*, and *C. acutus*, particularly at the bloom stations J and K. This reflects their effective clearance of large diatoms during the bloom (Fig. 1). The smaller two species, *M. gerlachei* and particularly *Oithona* spp., had smaller k values, reflecting a higher proportion of small cells in their diet. *Oithona* spp. was the only species with high clearance rates on nanoflagellates, 6–8 µm long (Fig. 1).

#### Clearance rate and food shape

The food assemblage comprised a wide diversity of cell shapes. At the two bloom stations, J and K, the large cells tended to be highly elongated or filamentous. Although it is clear from Figure 1 that the copepods, particularly the largest ones, are capable of eating these cells, the question being asked here is whether long thin cells are eaten at lower rates than shorter and fatter cells of similar volume.

For this analysis the clearance rates on pairs of diatom taxa were compared. Ciliates, dinoflagellates, and nanoflagellates could not be compared validly with diatoms because several species appeared to have selected these motile taxa in preference to diatoms of similar size (see following section). Two diatom taxa were defined as having similar volumes if they differed by no more than 20%. Across all the experiments, seven such pairs of diatoms could be compared, giving 54 comparisons of clearance rate across all species and replicates. Of this 54, only 20 (35%) yielded filtration rates that were higher for the shorter and fatter taxon. This infers that for the range of food and grazer size analysed (admittedly the larger ends of both spectra), cell elongation in one dimension is no defence against predation. To the contrary, the long thin cells, which frequently clogged our zooplankton nets at the bloom stations, were often cleared at near maximum rates by the larger species (Fig. 1).

#### Clearance rates on motile versus sessile cells

Figure 1 suggests that *Oithona* spp. and *M. gerlachei* cleared motile taxa (solid symbols) more rapidly than diatoms (open symbols). Interpretations are obscured by factors such as size and shape, so for a more rigorous approach, the question was posed as to whether, when motile and sessile taxa of similar size and shape are compared, the motile taxa are cleared at higher rates. Again a series of pairwise comparisons was possible. The motile taxa had length/width ratios ranging up to 2.6 between the experiments, so diatoms within this range of length/width ratios were defined as having a broadly similar shape. These diatoms are portrayed by

the large open circles in Figure 1. Similar size was defined as: lengths varied by no more than 20%, or widths varied by no more than 20%, or both. Across the 14 comparable pairs of taxa, cell dimensions were similar; the median ratio of their length (motile taxon/diatom) was 0.89 and the median ratio of their width was 1.17. The flattened silicoflagellate *Distephanus* spp. (43–48 µm diameter) was cleared at low rates and was not included in these comparisons.

For each pairwise comparison a selectivity index, *s* was calculated as *the clearance rate of the motile taxon minus the clearance rate of the sessile taxon*. Because the species differed in their overall clearance rates, these were first normalized to percentages of the maximum rate observed for the species in each experiment. Negative clearance rates were assigned as zero. Figure 2 illustrates the value of *s* among the replicate grazing jars for each of the available comparisons. The species differ appreciably in both the proportion of positive values of *s* and the average value of *s*. This is summarized in Table 5. The species appear to follow a trend of increasing selection for motile food, in the order *C. acutus*, *R. gigas*, *C. propinquus*, *M. gerlachei*, *Oithona* spp.

Whether *M. gerlachei* and *C. propinquus* changed in their degree of selectivity between pre-bloom and bloom stations is uncertain. *C. propinquus* was the only species incubated at all stations, and the strongest selection for motile cells was at the pre-bloom stations G and H. At the bloom stations J and K, however, the largest values of *s* were positive values (Fig. 2). This implies that their selection of motile cells persisted into the bloom.

Among the three species showing evidence for selection of motile prey, there are no indications that clearance rates of ciliates were different from those of dinoflagellates (Fig. 1). An exception to this was at station I, where *Oithona* spp. and *C. propinquus* had low clearance rates on ciliates compared with dinoflagellates of similar size.

### Contribution of motile taxa to copepod diets

Table 6 compares the percentages of total carbon in diatoms between the incubation water and the diets of

the five species. The remainder of the carbon estimates comprise motile taxa: nanoflagellates, dinoflagellates, and ciliates. The percentages in the incubation water reflect the changing environment, between the ice-dominated pre-bloom stations and the bloom in the open sea to the north (Robins *et al.*, 1995). Small flagellates were dominant under the ice, with small pennate diatoms comprising less than ≈25% of the carbon. At the open water bloom stations (J and K) large diatoms heavily dominated the total carbon. The diets of the larger species broadly reflected this change, with an increase in the contribution of diatoms. *Oithona* spp. preyed almost exclusively on motile taxa at the pre-bloom stations. *M. gerlachei* and to a lesser extent *C. propinquus* tended to select motile taxa, so it would be expected that these would comprise a greater percentage of their diet than seen in available food. Although this is sometimes the case (e.g. *M. gerlachei* at station K), size-based selection appears to have obscured this in other instances. For example, at station K the carbon in the motile component was mainly in medium-sized dinoflagellates (mean length 40 µm), whereas that in diatoms was mainly in cells over twice as long. Although *C. propinquus* appeared to prefer motile taxa to diatoms of similar size, the fact that larger cells were eaten more readily tended to counteract this.

### Discussion

Three features of these experiments were (1) that natural assemblages of food were offered to the copepods, (2)

Table 5. Comparison of selectivity indices (*s*).

| Species                   | No. of comparisons | Percentage of comparisons yielding positive value of <i>s</i> | Mean value of <i>s</i> , median value of <i>s</i> |
|---------------------------|--------------------|---------------------------------------------------------------|---------------------------------------------------|
| <i>Oithona</i> spp.       | 10                 | 90%                                                           | 63, 70                                            |
| <i>Metridia gerlachei</i> | 20                 | 75%                                                           | 18, 18                                            |
| <i>Calanus propinquus</i> | 25                 | 72%                                                           | 18, 10                                            |
| <i>Rhincalanus gigas</i>  | 16                 | 25%                                                           | –3.1, –3.0                                        |
| <i>Calanoides acutus</i>  | 12                 | 25%                                                           | –3.9, –6.9                                        |

Table 6. Percentages of total carbon contributed by diatoms in the incubation water and in the diets of the five species. Values are means, with ranges between replicates in parentheses.

| Station | Incubation water | Species             |                           |                           |                          |                          |
|---------|------------------|---------------------|---------------------------|---------------------------|--------------------------|--------------------------|
|         |                  | <i>Oithona</i> spp. | <i>Metridia gerlachei</i> | <i>Calanus propinquus</i> | <i>Rhincalanus gigas</i> | <i>Calanoides acutus</i> |
| G       | 22               | 0 (0,0)             |                           | 15                        |                          |                          |
| H       | 16               | 7.5 (7.3–7.7)       |                           | 10.4 (6.8–14)             |                          | (not feeding)            |
| I       | 9.4              | 0.4                 | 8.4 (6.2–11)              | 19                        |                          |                          |
| J       | 89               |                     | 88 (85–91)                | 92 (90–93)                | 97 (96–98)               | 95 (93–97)               |
| K       | 82               |                     | 45                        | 83 (82–83)                | 86 (83–89)               | 89                       |

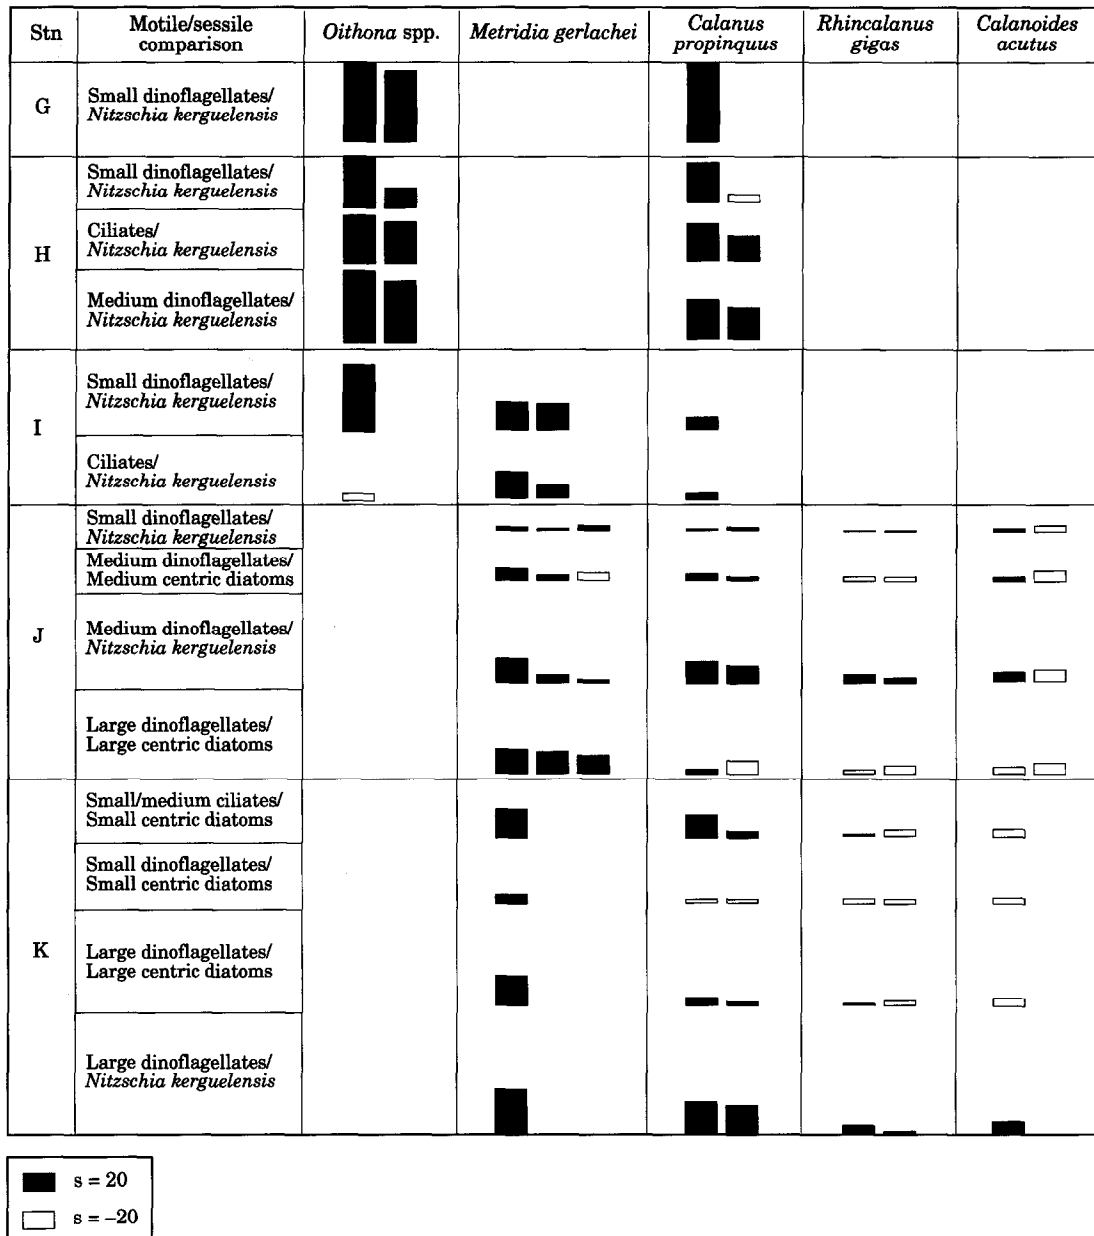

Figure 2. Selectivity indices,  $s$ , calculated from 14 motile/sessile clearance rate calculations. Each bar represents a replicate grazing jar. Positive values of  $s$  are represented by filled bars, negative values by open bars.

responses of a variety of copepods to identical food were compared, and (3) feeding rates were based on optical cell counts of individual food taxa. This combination was chosen to reduce some of the problems of feeding selectivity experiments. A particular problem is that the size, shape, and identity of the prey items need to be assessed simultaneously in order to gauge whether "carnivorous" behaviour is occurring, in addition to selection based on size and shape (Wiadnyana and Rassoulzadegan, 1989). Studies using optical cell counts and natural sea water have clearly demonstrated the

importance of protozoans in the diets of the genera *Acartia* and *Neocalanus* (Stoecker and Egloff, 1987; Gifford and Dagg, 1991; Gifford, 1993a; but see Tiselius, 1989). In some of these studies, however, the animal and plant food items were of different size, making it difficult to decide whether the protozoans had been selected actively or eaten indiscriminately (Tiselius, 1989).

Another serious problem in experiments employing natural sea water is that, being a living assemblage with turnover times of the order of a few days, individual



taxa can increase or decrease during the experiment. This might be independent of copepod grazing and attributable to microzooplankton grazing during the experiment (Turner and Granéli, 1992) or to reproduction of autotrophs (Granéli *et al.*, 1993), especially of small species (Roman and Rublee, 1980). Aloricate ciliates are also delicate and susceptible to high mortality (Tiselius, 1989; Gifford, 1993b). Probably as a result of these factors, diatoms increased in numbers in the incubations of *Oithona* spp. at station G, as indicated by the "negative" clearance rates (Fig. 1). In an attempt to allow for this, several species were exposed to the same prey assemblage, with the emphasis being on comparison. The range of patterns seen (Tables 4–6) lends credence to their being due to behavioural traits of the species, rather than to artifacts of incubation.

Copepods tend to be inefficient at filtering particles smaller than 5–10 µm (Nival and Nival, 1976; Berggreen *et al.*, 1988) but the upper and lower size limits of food have been established for only a small number of species. Berggreen *et al.* (1988) described the optimum food sizes (equivalent spherical diameter) for *Acartia tonsa* as 2 to 5% of prosome length. Applying this rule would give optimum food sizes of approximately 10–25 µm for *Oithona* spp., 55–138 µm for *M. gerlachei*, 85–213 µm for *C. propinquus* and *C. acutus*, and 140–350 µm for *Rhincalanus gigas*. Based on these results it would be predicted that the larger species could eat the large diatoms which characterized the bloom. This result was also found near South Georgia (Atkinson, 1994). Likewise, Vanderploeg *et al.* (1988) concluded from microcinematography and grazing experiments that elongation of cells in one dimension was no defence against ingestion by a freshwater copepod. However, the females incubated at the bloom stations represent the largest extremes of copepod size; it would be of interest to determine whether the early copepodite stages and smaller species could also tackle these long cells. Differences in preferred food size, related to copepod size, are suggested by Table 4. As suggested by Berggreen *et al.* (1988) and Atkinson (1994), this may tend to reduce competition for food between extremes of body size.

Against this background of food size selection, the species range widely in the extent of their selection for motile food. *Oithona* spp. appeared to have selected almost entirely for motile cells, whereas *C. acutus* and *R. gigas* appeared to have fed indiscriminately. It must be reiterated that not all of these motile taxa are heterotrophic; the presence of chlorophyll cannot be determined from Lugol's preserved samples. Nevertheless, many of the large dinoflagellates, which comprised a significant proportion of biomass of the motile fraction, were heterotrophic forms such as *Gyrodinium* spp. (Burkill *et al.*, 1995). With the proviso that predation rates on nauplii were not measured (they were too rare), the trends in selection for motile taxa are

likely to reflect the differing degrees of carnivory between the species.

The experiments could not test whether it was the motility, or other factors such as taste or ease of handling, which influenced selection. Nevertheless, the fact that a diverse grouping of taxa (nanoflagellates, dinoflagellates, and ciliates) all shared the characteristic of motility and tended (with two exceptions) to follow a common trend suggests that it was their motility which was somehow causing their selection. Mechanoreception of moving prey has been described in several copepod genera (Price, 1988; Landry and Fagerness, 1988). In contrast, Huntley *et al.* (1986) showed that the taste of certain noxious dinoflagellates caused rejection by copepods.

The diets of these copepod species are known mainly from gut contents analysis (e.g. Hopkins and Torres, 1989; Hopkins *et al.*, 1993a, b) as well as from feeding experiments (Schnack, 1985; Atkinson, 1994). Taken together, the results suggest seasonal differences in the degree of carnivory of *M. gerlachei* and *C. propinquus*, relative to *C. acutus* and *R. gigas*. Hopkins *et al.* (1993b) described *C. acutus* and *R. gigas* as the only herbivorous species found during spring, all others having a higher incidence of loricate protozoans/metazoans in their guts. In contrast, during summer and autumn, when food is presumably more abundant, both gut content analyses (Voronina and Sukhanova, 1976; Hopkins and Torres, 1989) and incubation studies (Schnack, 1985) suggest that the diets of all four species might be broadly similar, comprising mainly diatoms. Likewise, Huntley (1981) found that copepods fed indiscriminately during a bloom in the Labrador Sea. His reasoning was that if food was super-abundant and contains little detritus, then feeding does not need to be selective. Food availability increased dramatically along the present transect, which makes it a possible test for the above hypothesis. Although there is not enough data to be conclusive, Figure 2 suggests that *M. gerlachei* (and possibly *C. propinquus* as well) tended to select motile taxa, even when they contributed a small percentage of biomass during the bloom.

The dietary picture for *Oithona* spp. is not clear. In winter this genus was found with empty guts (Hopkins *et al.*, 1993a), whereas in autumn it contained almost exclusively diatoms (Hopkins and Torres, 1989). Turner (1986) and Paffenhöfer (1993) could find no clear consensus on the natural diet of this genus, despite several studies (e.g. Lampitt and Gamble, 1978; Uchima and Hirano, 1986; Turner and Granéli, 1989) finding, like this one, a preference for motile cells.

The trend in selection of motile food among the copepods might be linked to other aspects of their life cycles, discussed for these stations by Atkinson and Shreeve (1995). This is summarized in Table 7. Suggested strategies towards surviving the winter are, first, to cease feeding, to descend to the meso- or bathy-

Table 7. Trophic aspects of the life cycles of five major copepod species, with the species ordered to summarize trends between them.

| Species                   | Aspect of life cycle                                                                                                                                                                                         |                                                                                   |                                                                                                                                               |                                                                                                                                                                                              |
|---------------------------|--------------------------------------------------------------------------------------------------------------------------------------------------------------------------------------------------------------|-----------------------------------------------------------------------------------|-----------------------------------------------------------------------------------------------------------------------------------------------|----------------------------------------------------------------------------------------------------------------------------------------------------------------------------------------------|
|                           | Extent of feeding on motile food                                                                                                                                                                             | Extent of winter feeding                                                          | Reliance on lipid store                                                                                                                       | Extent of seasonal vertical migration                                                                                                                                                        |
| <i>Oithona</i> spp.       | Tends to select motile food                                                                                                                                                                                  | Feeds prior to spring bloom                                                       | Lower lipid content                                                                                                                           | Relatively small                                                                                                                                                                             |
| <i>Metridia gerlachei</i> |                                                                                                                             |  |                                                              |                                                                                                           |
| <i>Calanus propinquus</i> |                                                                                                                                                                                                              |                                                                                   |                                                                                                                                               |                                                                                                                                                                                              |
| <i>Rhincalanus gigas</i>  |                                                                                                                                                                                                              |                                                                                   |                                                                                                                                               |                                                                                                                                                                                              |
| <i>Calanoides acutus</i>  |                                                                                                                                                                                                              |                                                                                   |                                                                                                                                               |                                                                                                                                                                                              |
|                           | More indiscriminant in diet                                                                                                                                                                                  | Diapause in winter                                                                | High lipid content                                                                                                                            | Extensive migration                                                                                                                                                                          |
| Comments/exceptions       | <i>Oithona</i> spp. food selectivity not tested during a bloom, although their diets comprised diatoms during autumn (Hopkins and Torres, 1989). Diets change seasonally (see Hopkins <i>et al.</i> , 1993a) | Hopkins <i>et al.</i> (1993a) found <i>Oithona</i> spp. with empty guts in winter | <i>Oithona</i> spp. not tested.<br><br><i>Calanus propinquus</i> has extensive store of triacylglycerol (Schnack-Schiel <i>et al.</i> , 1991) | <i>M. gerlachei</i> resides deeper than the other species (Schnack-Schiel and Hagen, 1995)<br><br>Extent of migration may vary regionally and inter-annually (Bathmann <i>et al.</i> , 1993) |

pelagic, and to enter diapause (Voronina, 1978; Marin, 1988; Schnack-Schiel *et al.*, 1991). Second, a species could remain active in the surface layers, feeding, possibly carnivorously, underneath the ice during the winter (Bathmann *et al.*, 1993; Schnack-Schiel and Hagen, 1995; Atkinson and Shreeve, 1995). The latter strategy appears to be adopted, in varying degrees, by *Oithona* spp., *M. gerlachei*, and *C. propinquus*. Although there appear to be some exceptions and *Oithona* spp. has been little studied (Metz, 1995), the species seem to follow a systematic gradient between these alternative winter survival strategies.

Carnivorous feeding may be a prerequisite if a species is to remain active in a low chlorophyll environment during winter. As well as the fact that a higher proportion of organic carbon resides in motile forms, the selection of motile prey may help a copepod to cut its feeding costs. *Oithona* spp., for example, appeared to spend most of their time motionless at the pre-bloom stations, darting only occasionally (to capture food?). A large portion of the particulates, especially at stations in the vicinity of the ice, were inorganic detritus (Robins *et al.*, 1995). By selecting only nutritious motile cells a copepod could increase its feeding efficiency.

This explanation of selective feeding before the bloom is analogous to "peak tracking", where copepods feed

efficiently on the particle type which dominates the numbers, volume or carbon in their food source. Both observations of selective grazing and their explanations are debated (Huntley, 1981; Turner and Tester, 1989), but it seems that large particles can be selected from mixtures (e.g. Runge, 1980), possibly by raptorial feeding (Price *et al.*, 1983). This is one possible explanation for the high feeding rates on large diatoms, exhibited by the larger copepods during the bloom. Decreased efficiency in handling small cells may have contributed to this effect. However, it is clear that during the bloom the copepods had not switched to feeding solely on the single cell type (large centric diatoms) that dominated the volume and carbon of the food at stations J and K. These cells (83–90  $\mu\text{m}$  long) were cleared at similar rates to other rarer diatoms of equivalent size (Fig. 1).

The grazing impact of the copepod community was estimated to reach at most (which was at station K) only 8% of daily production by cells  $> 2 \mu\text{m}$  (Atkinson and Shreeve, 1995). Heterotrophic dinoflagellates and ciliates appeared to be the major grazers (maximum estimate, again at station K, was 271% of daily primary production; Burkill *et al.*, 1995). If copepods selectively ingest large protozoans, or at least ingest them at near maximum rates (Fig. 1), then by acting as a "top

predator" on the microbial food web they would relieve some of the high protozoan grazing impact. The extreme discrepancy between the algal grazing impact of copepods and protozoans suggests that the role of copepods as "top predators" rather than "algal grazers" would be a more appropriate one to consider in this food web.

## Acknowledgements

I thank the officers and crew of R.R.S. "James Clark Ross" who made sampling possible on this cruise. Pauline Smith analysed the chlorophyll content of the incubation water. Helpful comments on the manuscript were provided by R. S. Shreeve, P. Ward, R. J. G. Leakey, J. Priddle, and A. Clarke. A. W. A. Murray provided cautionary advice on statistics.

## References

- Atkinson, A. 1994. Diets and feeding selectivity among the epipelagic copepod community near South Georgia in summer. *Polar Biology*, 14: 551–560.
- Atkinson, A., and Shreeve, R. S. 1995. Response of the copepod community to a spring bloom in the Bellingshausen Sea. *Deep-Sea Research*.
- Banase, K. 1992. Grazing, temporal changes of phytoplankton concentrations, and the microbial loop in the open sea. In *Primary productivity and biogeochemical cycles in the sea*, pp. 409–440. Ed. by P. G. Falkowski and A. D. Woodhead. Plenum Press, New York.
- Bathmann, U. V., Makarov, R. R., Spiridinov, V. A., and Rohardt, G. 1993. Winter distribution and overwintering strategies of the Antarctic copepod species *Calanoides acutus*, *Rhincalanus gigas*, and *Calanus propinquus* (Crustacea, Calanoida) in the Weddell Sea. *Polar Biology*, 13: 333–346.
- Berggreen, U., Hansen, B., and Kiørboe, T. 1988. Food size spectra, ingestion and growth of the copepod *Acartia tonsa* during development: implications for the determination of copepod production. *Marine Biology*, 99: 341–352.
- Burkill, P., Edwards, E. S., and Sleigh, M. A. Microzooplankton and their role in controlling phytoplankton growth in the marginal ice zone of the Bellingshausen Sea. *Deep-Sea Research*. (In press.)
- Dagg, M. J. 1993. Grazing by the copepod community does not control phytoplankton production in the subarctic Pacific Ocean. *Progress in Oceanography*, 32: 163–183.
- Deason, E. E. 1980. Potential effect of phytoplankton colony breakage on the calculation of zooplankton filtration rates. *Marine Biology*, 57: 279–286.
- Eppley, R. W., Reid, F. M. H., and Strickland, J. D. H. 1970. Estimates of phytoplankton crop size, growth rate, and primary production. In *The ecology of the phytoplankton off La Jolla, California, in the period April through September, 1967*. Part III. Ed. by J. D. H. Strickland. *Bulletin of Scripps Institution of Oceanography*, 17: 33–42.
- Fessenden, L., and Cowles, T. J. 1994. Copepod predation on heterotrophic ciliates in Oregon coastal waters. *Marine Ecology Progress Series*, 107: 103–111.
- Frost, B. W. 1972. Effects of size and concentration of food particles on the feeding behaviour of the marine planktonic copepod *Calanus pacificus*. *Limnology and Oceanography*, 17: 805–815.
- Frost, B. W. 1993. A modelling study of processes regulating plankton standing stock and production in the open subarctic Pacific Ocean. *Progress in Oceanography*, 32: 17–56.
- Garrison, D. L. 1991. An overview of the abundance and role of protozooplankton in Antarctic waters. *Journal of Marine Systems*, 2: 317–331.
- Gifford, D. J. 1991. The protozoan–metazoan link in pelagic ecosystems. *Journal of Protozoology*, 38: 81–86.
- Gifford, D. J. 1993a. Protozoa in the diets of *Neocalanus* spp. in the oceanic subarctic Pacific Ocean. *Progress in Oceanography*, 32: 223–237.
- Gifford, D. J. 1993b. Consumption of protozoa by copepods feeding on natural microplankton assemblages. In *Handbook of aquatic microbial ecology*, pp. 723–729. Ed. by P. F. Kemp, B. F. Sherr, E. B. Sherr, and J. J. Cole. Lewis Publishers, London.
- Gifford, D. J., and Dagg, M. J. 1988. Feeding of the estuarine copepod *Acartia tonsa* Dana: carnivory vs herbivory in natural microplankton assemblages. *Bulletin of Marine Science*, 43: 458–468.
- Gifford, D. J., and Dagg, M. J. 1991. The microzooplankton–mesozooplankton link: consumption of planktonic protozoa by the calanoid copepods *Acartia tonsa* Dana and *Neocalanus plumchrus* Murukawa. *Marine Microbial Food Webs*, 5: 161–177.
- Granéli, E., Granéli, W., Mozzam Rabbani, M. M., Daugbjerg, N., Fransch, G., Cuzin-Roudy, J., and Alder, V. A. 1993. The influence of copepod and krill grazing on the species composition of phytoplankton communities from the Scotia–Weddell Sea. *Polar Biology*, 13: 201–213.
- Hopkins, T. L., Ainley, D. G., Torres, J. J., and Lancraft, T. M. 1993b. Trophic structure in open waters of the marginal ice zone in the Scotia–Weddell confluence region during spring (1983). *Polar Biology*, 13: 389–397.
- Hopkins, T. L., Lancraft, T. M., Torres, J. J., and Donnelly, J. 1993a. Community structure and trophic ecology of zooplankton in the Scotia Sea marginal ice zone in winter (1988). *Deep-Sea Research*, 40: 81–105.
- Hopkins, T. L., and Torres, J. J. 1989. Midwater food web in the vicinity of a marginal ice zone in the Western Weddell Sea. *Deep-Sea Research*, 36: 543–560.
- Huntley, M. E. 1981. Nonselective, nonsaturated feeding by three calanid copepod species in the Labrador Sea. *Limnology and Oceanography*, 26: 831–842.
- Huntley, M. E., Sykes, P., Rohan, S., and Marin, V. 1986. Chemically mediated rejection of dinoflagellate prey by the copepods *Calanus pacificus* and *Paracalanus parvus*: mechanisms, occurrence, significance. *Marine Ecology Progress Series*, 28: 105–120.
- Kleppel, G. S., Frazel, D. W., Pieper, R. E., and Holliday, D. V. 1988. Natural diets of zooplankton off Southern California. *Marine Ecology Progress Series*, 49: 231–241.
- Lampitt, R. S., and Gamble, J. C. 1982. Diet and respiration of the small planktonic copepod *Oithona nana*. *Marine Biology*, 66: 185–190.
- Landry, M. R. 1981. Switching between herbivory and carnivory by the planktonic marine copepod, *Calanus pacificus*. *Marine Biology*, 67: 77–82.
- Landry, M. R., and Fagerness, V. L. 1988. Behavioural and morphological influences on predatory interactions among marine copepods. *Bulletin of Marine Science*, 43: 509–529.
- Leakey, R. J. G., Burkill, P. H., and Sleigh, M. A. 1994. A comparison of fixatives for the estimation of abundance and biovolume of marine planktonic ciliate populations. *Journal of Plankton Research*, 16: 375–389.
- Marin, V. 1988. Qualitative models of the life cycles of *Calanoides acutus*, *Calanus propinquus* and *Rhincalanus gigas*. *Polar Biology*, 8: 439–446.

- Metz, C. 1995. Seasonal variation in the distribution and abundance of *Oithona* and *Oncaea* species (Crustacea, Copepoda) in the southeastern Weddell Sea, Antarctica. *Polar Biology*, 15: 187–194.
- Morales, C. E., Bedo, A., Harris, R. P., and Tranter, P. R. G. 1991. Grazing of copepod assemblages in the north-east Atlantic: the importance of the small size fraction. *Journal of Plankton Research*, 13: 455–472.
- Morales, C. E., Harris, R. P., Head, R. N., and Tranter, P. R. G. 1993. Copepod grazing in the oceanic northeast Atlantic during a six-week drifting station: the contribution of size classes and vertical migrants. *Journal of Plankton Research*, 15: 185–211.
- Nival, P., and Nival, S. 1976. Particle retention efficiencies of an herbivorous copepod, *Acartia clausi* (adult and copepodite stages): effects on grazing. *Limnology and Oceanography*, 21: 24–39.
- Øresland, V., and Ward, P. 1993. Summer and winter diet of four carnivorous copepod species around South Georgia. *Marine Ecology Progress Series*, 98: 73–78.
- Paffenhöfer, G.-A. 1993. On the ecology of marine cyclopoid copepods (Crustacea, Copepoda). *Journal of Plankton Research*, 15: 37–55.
- Parsons, T. R., Maita, Y., and Lalli, C. M. 1984. A manual of chemical and biological methods of seawater analysis. Pergamon, Oxford.
- Price, H. J. 1988. Feeding mechanisms in marine and freshwater zooplankton. *Bulletin of Marine Science*, 43: 327–343.
- Price, H. J., Paffenhöfer, G.-A., and Strickler, J. R. 1983. Modes of cell capture in calanoid copepods. *Limnology and Oceanography*, 28: 116–123.
- Robins, D. B., Harris, R. P., Bedo, A. W., Fernandez, E., Harbour, D. S., and Head, R. N. The relationship between suspended particulate material, phytoplankton and zooplankton during retreat of the marginal ice zone in the Bellingshausen Sea. *Deep-Sea Research*. (In press.)
- Roman, M. R., and Rublee, P. A. 1980. Containment effects in copepod grazing experiments: a plea to end the black box approach. *Limnology and Oceanography*, 25: 982–990.
- Runge, J. A. 1980. Effects of hunger and season on the feeding behaviour of *Calanus pacificus*. *Limnology and Oceanography*, 25: 134–145.
- Schnack, S. B. 1985. Feeding by *Euphuasia superba* and copepod species in response to varying concentrations of phytoplankton. In *Antarctic nutrient cycles and food webs*, pp. 311–323. Ed. by W. R. Siegfried, P. R. Condy, and R. M. Laws. Springer-Verlag, Berlin.
- Schnack-Schiel, S. B., and Hagen, W. 1995. Life cycle strategies and seasonal variations in distribution and population structure of four dominant calanoid copepod species in the Weddell Sea, Antarctica. *Journal of Plankton Research*, 16: 1543–1566.
- Schnack-Schiel, S. B., Hagen, W., and Mizdalski, E. 1991. Seasonal comparison of *Calanoides acutus* and *Calanus propinquus* (Copepoda: Calanoida) in the southeast Weddell Sea, Antarctica. *Marine Ecology Progress Series*, 70: 17–27.
- Stoecker, D. K., and Capuzzo, J. M. 1990. Predation on protozoa: its importance to zooplankton. *Journal of Plankton Research*, 12: 891–908.
- Stoecker, D. K., and Egloff, D. A. 1987. Predation by *Acartia tonsa* on planktonic ciliates and rotifers. *Journal of Experimental Marine Biology and Ecology*, 110: 53–68.
- Tiselius, P. 1989. Contribution of aloricate ciliates to the diet of *Acartia clausi* and *Centropages hamatus* in coastal waters. *Marine Ecology Progress Series*, 56: 49–56.
- Tsuda, A., Furuya, K., and Nemoto, T. 1989. Feeding of micro- and macroplankton at the subsurface chlorophyll maximum in the subtropical North Pacific. *Journal of Experimental Marine Biology and Ecology*, 132: 41–52.
- Turner, D. R., and Owens, N. J. P. The Sterna 92 expedition: an overview. *Deep-Sea Research*. (In press.)
- Turner, J. T. 1986. Zooplankton feeding ecology: contents of faecal pellets of the cyclopoid copepods *Oncaea venusta*, *Corycaeus amazonicus*, *Oithona plumifera*, and *O. simplex* from the northern Gulf of Mexico. P.S.A.N.I.: *Marine Ecology*, 7: 289–302.
- Turner, J. T. 1991. Zooplankton feeding ecology: do co-occurring copepods compete for the same food? *Reviews in Aquatic Sciences*, 5: 101–195.
- Turner, J. T., and Granéli 1992. Zooplankton feeding ecology: grazing during enclosure studies of phytoplankton blooms from the west coast of Sweden. *Journal of Experimental Marine Biology and Ecology*, 157: 19–31.
- Turner, J. T., and Tester, P. A. 1989. Zooplankton feeding ecology: nonselective grazing by the copepods *Acartia tonsa* Dana, *Centropages velificatus* De Oliveira, and *Eucalanus pileatus* Giesbrecht in the plume of the Mississippi River. *Journal of Experimental Marine Biology and Ecology*, 126: 21–43.
- Uchima, M., and Hirano, R. 1986. Food of *Oithona davisae* (Copepoda: Cyclopoida) and the effect of food concentration at first feeding on the larval growth. *Bulletin of the Plankton Society of Japan*, 33: 21–28.
- Vanderploeg, H. A., Paffenhöfer, G.-A., and Liebig, J. R. 1988. *Diatom* vs. net phytoplankton: effects of algal size and morphology on selectivity of a behaviourally flexible, omnivorous copepod. *Bulletin of Marine Science*, 43: 377–394.
- Voronina, N. M. 1978. Variability in ecosystems. In *Advances in oceanography*, pp. 221–243. Ed. by H. Charnock and G. E. R. Deacon.
- Voronina, N. M., and Sukhanova, I. N. 1976. Composition of food of massive species of herbivorous Antarctic copepods. *Oceanology*, 16: 614–616.
- Wiadnyana, N. N., and Rassoulzadegan, F. 1989. Selective feeding of *Centropages typicus* on microzooplankton. *Marine Ecology Progress Series*, 53: 37–45.
